# Supplementary material for: Iron antimonate quantum dots exhibiting tunable visible light emission
Source: Royal Society of Chemistry journal article supplement (doi:10.1039/c6nj02767a), 2017-01-01
Supplement: c6nj02767a1.pdf [file c6nj02767a1.pdf]

Electronic Supplementary Information

Manuscript ID: NJ-ART-09-2016-002767

Title: Iron Antimonate Quantum Dots Exhibiting Tunable Visible Light Emission

Authors: Pratanu Nag, Partha Pratim Das, Anurag Roy and Parukuttyamma Sujatha Devi\*

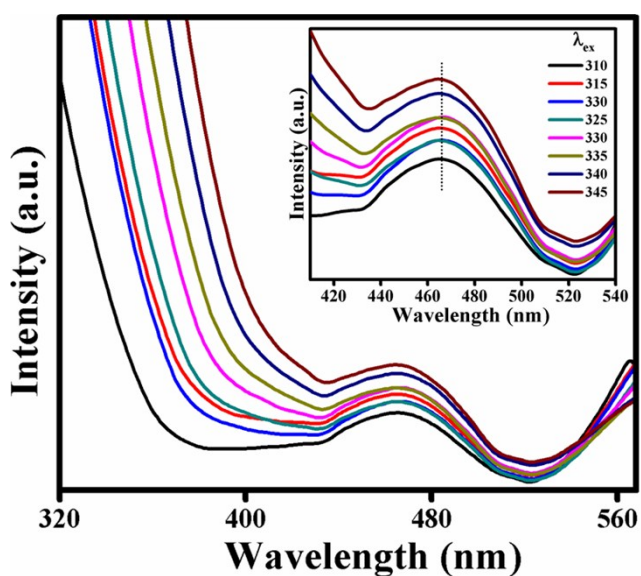

**Figure S1:** Excitation wavelength depended room temperature PL spectra of as prepared FeSbO<sub>4</sub>. Inset: Close observation at ~465nm of the same PL spectra.

**Table ST1:** Optical parameters recorded for both the water dispersions of FeSb<sub>300</sub> and FeSb<sub>450</sub> nanoparticles using photoluminescence spectroscopic analysis at room temperature.

| <b>Sample</b>       | <b>Excitation Wavelength (nm)</b> | <b>Excitation Scan (nm)</b> | <b>Emission Scan (nm)</b> | <b>Stoke's shift (nm)</b> | <b>CIE coordinates (x,y)</b> |
|---------------------|-----------------------------------|-----------------------------|---------------------------|---------------------------|------------------------------|
| FeSb <sub>300</sub> | 310                               | 333                         | 376                       | 43                        | (0.16,0.06)                  |
| FeSb <sub>300</sub> | 315                               | 343                         | 389                       | 46                        | (0.17,0.11)                  |
| FeSb <sub>300</sub> | 320                               | 348                         | 395                       | 47                        | (0.17,0.11)                  |
| FeSb <sub>300</sub> | 325                               | 356                         | 408                       | 52                        | (0.17,0.11)                  |
| FeSb <sub>300</sub> | 330                               | 367                         | 419                       | 52                        | (0.17,0.11)                  |
| FeSb <sub>300</sub> | 335                               | 369                         | 422                       | 53                        | (0.17,0.09)                  |
| FeSb <sub>300</sub> | 340                               | 373                         | 427                       | 54                        | (0.17,0.10)                  |
| FeSb <sub>300</sub> | 345                               | 377                         | 434                       | 57                        | (0.15,0.08)                  |
| FeSb <sub>450</sub> | 310                               | 335                         | 384                       | 49                        | (0.16,0.07)                  |
| FeSb <sub>450</sub> | 315                               | 345                         | 399                       | 54                        | (0.16,0.08)                  |
| FeSb <sub>450</sub> | 320                               | 350                         | 409                       | 59                        | (0.16,0.09)                  |
| FeSb <sub>450</sub> | 325                               | 360                         | 417                       | 57                        | (0.16,0.09)                  |
| FeSb <sub>450</sub> | 330                               | 369                         | 424                       | 55                        | (0.16,0.09)                  |
| FeSb <sub>450</sub> | 335                               | 371                         | 428                       | 57                        | (0.16,0.09)                  |
| FeSb <sub>450</sub> | 340                               | 373                         | 431                       | 58                        | (0.16,0.09)                  |
| FeSb <sub>450</sub> | 345                               | 389                         | 439                       | 60                        | (0.17,0.10)                  |

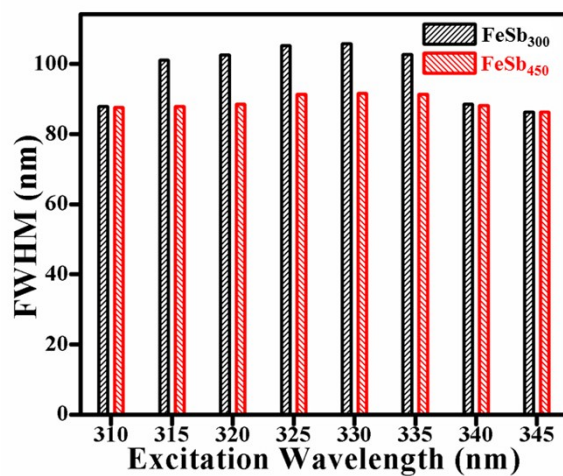

**Figure S2:** Variation of FWHM of PL spectra for FeSb<sub>300</sub> and FeSb<sub>450</sub> at different excitation wavelength from 310 to 345 nm.

**Table ST2. Photoluminescence QY comparison of few classical QDs with the synthesized FeSb<sub>300</sub> and FeSb<sub>450</sub> nanoparticles**

| QDs                 | QY                          | Reference    |
|---------------------|-----------------------------|--------------|
| CdSe                | 0.65-0.85                   | 52-53        |
| InP                 | 0.01-0.40                   | 54-55        |
| CdTe/ CdHgTe        | 0.30-0.75                   | 57-59        |
| PbS                 | 0.26-0.70                   | 60-61        |
| PbSe                | 0.10-0.80                   | 62-63        |
| ZnSe                | 0.81                        | 64           |
| FeSb <sub>300</sub> | 8.5% (w.r.t. reference dye) | Current Work |
| FeSb <sub>450</sub> | 5.4% (w.r.t. reference dye) | Current Work |

**Quantum Yield (QY) Calculation:** We have measured the QY of the blue emission with respect to standard quinine sulphate (QY=0.54) in 0.1(M) H<sub>2</sub>SO<sub>4</sub> using following formula,

$$(QY)_{\text{sample}} = (QY)_{\text{standard}} \left( \frac{I_{\text{sample}}}{I_{\text{standard}}} \right) \left( \frac{A_{\text{standard}}}{A_{\text{sample}}} \right) \left( \frac{\eta_{\text{sample}}}{\eta_{\text{standard}}} \right) [51]$$

I, stands for the integrated peak area of the fluorescence curve, A is the absorbance at excitation wavelength of the concerned sample and  $\eta$  is refractive index of water.

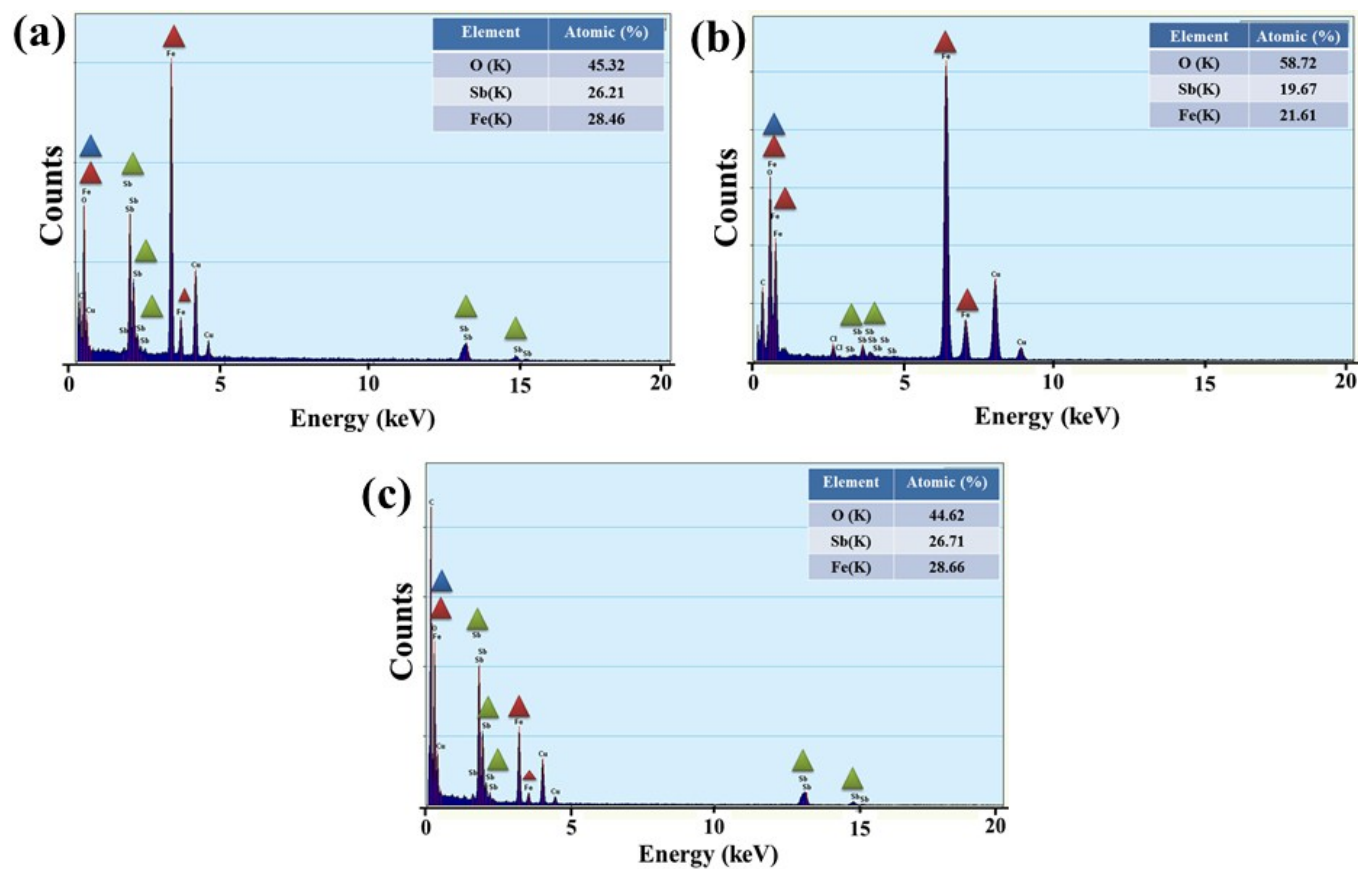

**Figure S3:** (a), (b) and (c) EDAX spectrum of as prepared, FeSb<sub>300</sub> and FeSb<sub>450</sub> nanoparticles along with their elemental compositional table. Fe: ▲ Sb: ▲ O: ▲
